# Supplementary material for: Transcriptome&nbsp;Analysis of Brain Tissues in a MeCP2-Null Rat Model of Rett Syndrome
Source: Preprints.org preprint supplement (doi:10.20944/preprints201904.0031.v1), 2019-04-02
Supplement: Supplementary file 1 [file supplementary]

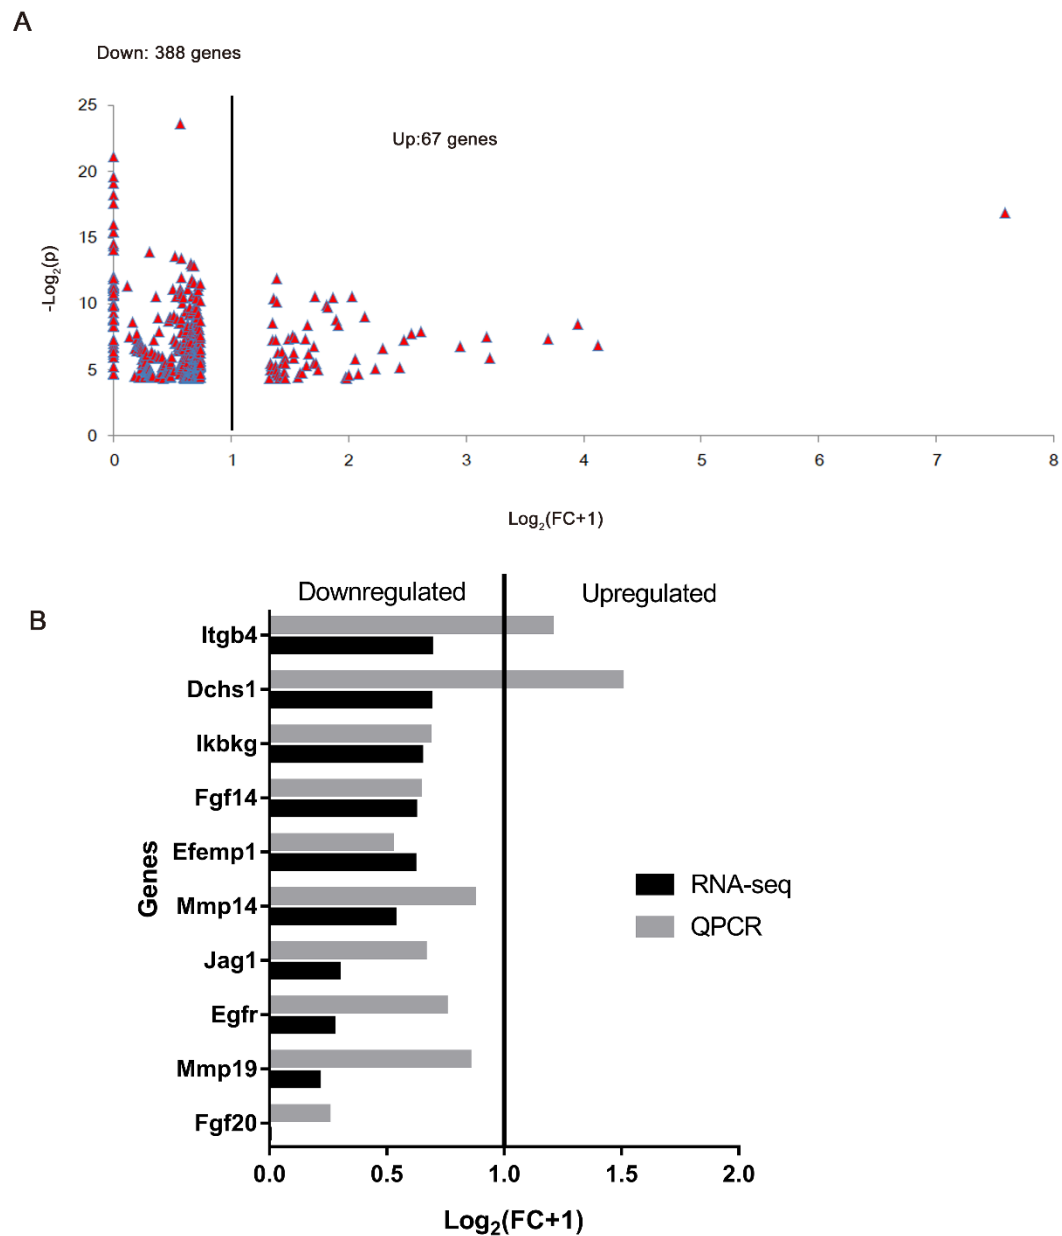

Figure 1. **Genes significantly affected by MeCP2 KO in the rat cerebellum.** (A). Volcano plot showing the DEGs in the MeCP2-null rat cerebellum transcriptome. (B). Comparison of the qRT-PCR results and RNA-seq results for 10 DEGs. FC: fold change in MeCP2-KO versus WT rats.

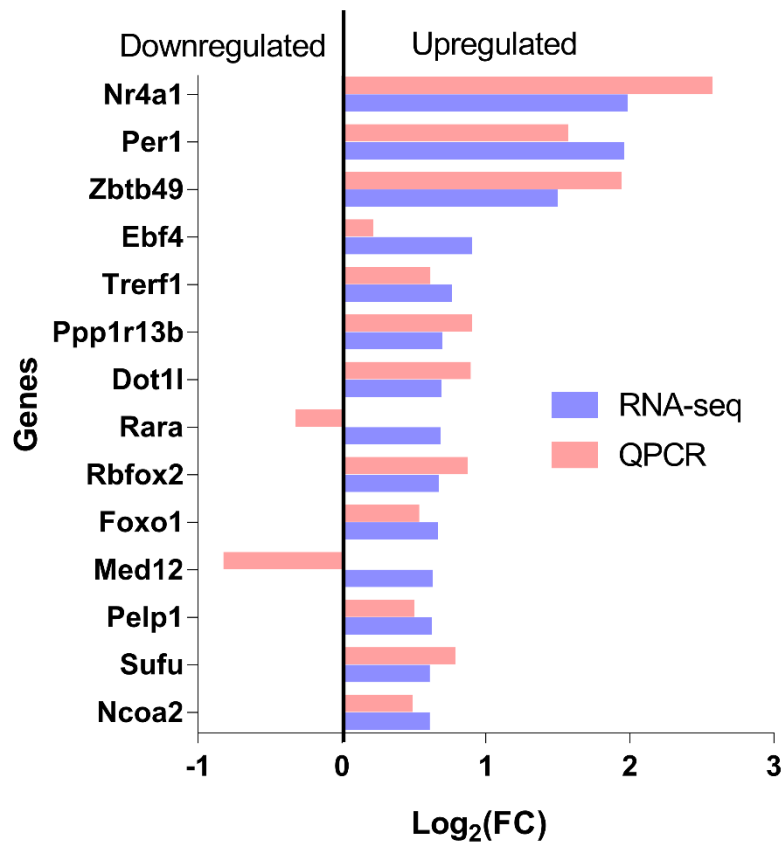

Figure 2. Comparison of the qRT-PCR results and RNA-seq results for 14 DEGs from MeCP2-null rat cerebral cortex tissues. FC: fold change in MeCP2-KO versus WT rats.
